# Supplementary material for: Differential binding of 2′-biotinylated analogs of c-di-GMP with c-di-GMPriboswitches and binding proteins
Source: Royal Society of Chemistry journal article supplement (doi:10.1039/c2mb05338a), 2011-12-19

## Differential binding of 2'-biotinylated analogs of c-di-GMP with c-di-GMP riboswitches and binding proteins

Yiling Luo, Jie Zhou, Sarah K. Watt, Vincent T. Lee, T. Kwaku Dayie and Herman O. Sintim\*

Department of Chemistry and Biochemistry,  
University of Maryland, MD 20742, USA  
E-mail: hsintim@umd.edu

Table S1: Different ligands (c-di-GMP, endo-S-c-di-GMP, compound **5** and compound **6**) docking into Vc2 RNA (PDB: 3IRW). The different conformers of each ligand were optimized using Gaussian with fixed C5'-C5' distance of two guanines. Dockings were done in triplicate for each c-di-GMP and analog conformers.

| Ligand          | Distance (Å) between C5 of two guanines in Gaussian optimized structure | Distance (Å) between C5 of two guanines after docking |      |       | Docked binding affinity (kcal/mol) |       |       |
|-----------------|-------------------------------------------------------------------------|-------------------------------------------------------|------|-------|------------------------------------|-------|-------|
| c-di-GMP        | 5.5                                                                     | 5.81                                                  | 5.82 | 5.82  | -12.2                              | -12.2 | -12.2 |
|                 | 6.5                                                                     | 6.12                                                  | 6.10 | 6.10  | -11.8                              | -11.8 | -11.8 |
|                 | 6.6                                                                     | 6.46                                                  | 6.46 | 6.46  | -14.6                              | -14.6 | -14.7 |
|                 | 6.7                                                                     | 6.51                                                  | 6.51 | 6.51  | -15.1                              | -15.1 | -15.1 |
|                 | 6.8                                                                     | 6.46                                                  | 6.46 | 6.45  | -13.6                              | -13.6 | -13.5 |
|                 | 6.9                                                                     | 6.93                                                  | 6.65 | 6.65  | -11.3                              | -16.2 | -16.2 |
|                 | 7.0                                                                     | 6.71                                                  | 7.00 | 6.72  | -16.7                              | -11.3 | -16.7 |
|                 | 7.1                                                                     | 6.79                                                  | 6.79 | 6.79  | -17                                | -17.1 | -17   |
|                 | 7.2                                                                     | 6.85                                                  | 6.86 | 6.86  | -17.1                              | -17.3 | -16.9 |
|                 | 7.3                                                                     | 6.93                                                  | 6.92 | 6.93  | -17.4                              | -17.4 | -17.4 |
|                 | 7.4                                                                     | 6.99                                                  | 6.99 | 6.99  | -17.5                              | -17.5 | -17.5 |
|                 | 7.5                                                                     | 6.92                                                  | 6.93 | 6.92  | -16.9                              | -16.9 | -16.9 |
|                 | 7.6                                                                     | 7.13                                                  | 7.13 | 7.13  | -17.5                              | -17.5 | -17.5 |
|                 | 7.7                                                                     | 7.20                                                  | 7.20 | 7.20  | -17.3                              | -17.4 | -17.4 |
|                 | 7.8                                                                     | 7.28                                                  | 7.28 | 7.28  | -17.1                              | -17   | -17.1 |
| 7.9             | 7.35                                                                    | 7.35                                                  | 7.35 | -16.7 | -16.7                              | -16.7 |       |
| 8.0             | 7.42                                                                    | 7.43                                                  | 7.42 | -16.2 | -16.1                              | -16.2 |       |
| 8.5             | 7.48                                                                    | 7.46                                                  | 7.45 | -12.5 | -12.5                              | -12.5 |       |
| 9.5             | 7.75                                                                    | 8.37                                                  | 8.37 | -10.4 | -11.4                              | -11.3 |       |
| endo-S-c-di-GMP | 5.5                                                                     | 5.75                                                  | 5.75 | 5.75  | -11.1                              | -11.1 | -11.2 |
|                 | 6.0                                                                     | 6.12                                                  | 6.11 | 6.12  | -11.5                              | -11.5 | -11.5 |
|                 | 6.5                                                                     | 6.87                                                  | 6.88 | 6.88  | -13.1                              | -13   | -13   |
|                 | 6.6                                                                     | 6.95                                                  | 6.95 | 6.95  | -13.3                              | -13.3 | -13.2 |
|                 | 6.7                                                                     | 7.17                                                  | 7.17 | 7.17  | -13.1                              | -13.2 | -13.1 |
|                 | 6.8                                                                     | 7.12                                                  | 7.12 | 7.12  | -12.6                              | -12.6 | -12.6 |

|                                                                                |       |       |       |       |       |       |       |
|--------------------------------------------------------------------------------|-------|-------|-------|-------|-------|-------|-------|
|                                                                                | 6.9   | 7.18  | 7.19  | 7.19  | -13.9 | -13.9 | -13.9 |
|                                                                                | 7.0   | 7.27  | 7.27  | 7.27  | -13.9 | -13.9 | -13.9 |
|                                                                                | 7.1   | 7.35  | 7.35  | 7.35  | -14   | -14   | -14   |
|                                                                                | 7.2   | 7.43  | 7.43  | 7.43  | -14   | -14   | -13.9 |
|                                                                                | 7.3   | 7.50  | 7.50  | 7.50  | -13.9 | -13.9 | -13.9 |
|                                                                                | 7.4   | 7.57  | 7.57  | 7.57  | -13.9 | -13.9 | -13.9 |
|                                                                                | 7.5   | 7.66  | 7.74  | 7.66  | -12.6 | -12.6 | -12.6 |
|                                                                                | 7.6   | 7.88  | 8.36  | 7.88  | -12.3 | -11.7 | -12.3 |
|                                                                                | 7.7   | 7.96  | 7.96  | 7.96  | -12   | -12   | -12   |
|                                                                                | 7.8   | 7.20  | 7.21  | 7.20  | -13.5 | -13.5 | -13.5 |
|                                                                                | 7.9   | 7.95  | 7.95  | 7.95  | -12.9 | -12.9 | -12.9 |
|                                                                                | 8.0   | 8.03  | 8.03  | 8.03  | -12.5 | -12.5 | -12.5 |
|                                                                                | 8.5   | 8.62  | 7.65  | 8.61  | -11.3 | -12.8 | -11.2 |
|                                                                                | 9.5   | 8.71  | 8.71  | 8.72  | -12.1 | -12.1 | -12.1 |
| <b>Compound 5</b><br><b>(model for 2'-[Biotin]-</b><br><b>endo-S-c-di-GMP)</b> | 5.5   | 7.50  | 7.19  | 7.18  | -11.2 | -11.3 | -11.2 |
|                                                                                | 6.5   | 6.73  | 6.73  | 6.73  | -11.2 | -11.2 | -11.2 |
|                                                                                | 6.8   | 7.00  | 6.99  | 7.00  | -11.4 | -11.3 | -11.4 |
|                                                                                | 6.9   | 7.09  | 7.09  | 7.09  | -11.4 | -11.4 | -11.4 |
|                                                                                | 7.0   | 7.20  | 7.20  | 7.20  | -11.4 | -11.4 | -11.4 |
|                                                                                | 7.1   | 7.20  | 7.20  | 7.20  | -11.4 | -11.4 | -11.4 |
|                                                                                | 7.2   | 7.41  | 7.41  | 7.41  | -11.2 | -11.2 | -11.2 |
|                                                                                | 7.3   | 7.53  | 7.53  | 7.53  | -10.6 | -10.8 | -10.6 |
|                                                                                | 7.4   | 7.48  | 7.62  | 7.48  | -11.1 | -10.5 | -11.1 |
|                                                                                | 7.5   | 7.68  | 7.68  | 7.68  | -11.7 | -11.7 | -11.7 |
|                                                                                | 7.6   | 7.84  | 7.84  | 7.84  | -11.6 | -11.6 | -11.5 |
|                                                                                | 7.7   | 7.98  | 7.98  | 7.98  | -11.6 | -11.6 | -11.6 |
|                                                                                | 7.8   | 9.26  | 9.26  | 9.26  | -11.5 | -11.5 | -11.5 |
| 8.0                                                                            | 9.48  | 9.48  | 9.48  | -11.7 | -11.6 | -11.7 |       |
| 8.5                                                                            | 9.47  | 9.47  | 9.69  | -10.8 | -10.8 | -11.6 |       |
| 9.5                                                                            | 10.50 | 10.07 | 10.49 | -10.2 | -10.9 | -11.3 |       |
| <b>Compound 6</b><br><b>(model for 2'-[Biotin]</b><br><b>-AHC-c-di-GMP)</b>    | 5.5   | 6.52  | 6.52  | 6.52  | -9.7  | -9.7  | -9.7  |
|                                                                                | 6.5   | 6.08  | 6.09  | 6.08  | -10.2 | -10.1 | -10.1 |
|                                                                                | 6.8   | 6.35  | 6.35  | 6.35  | -10.1 | -10.1 | -10.1 |
|                                                                                | 6.9   | 7.56  | 7.59  | 7.55  | -10.4 | -10.3 | -10.3 |
|                                                                                | 7.0   | 7.67  | 7.73  | 7.67  | -10.3 | -10.3 | -10.4 |
|                                                                                | 7.1   | 7.78  | 7.80  | 7.85  | -10.2 | -10.2 | -10.1 |
|                                                                                | 7.2   | 7.87  | 7.88  | 8.05  | -10.2 | -10.2 | -10.2 |
|                                                                                | 7.5   | 7.98  | 8.00  | 8.05  | -10.6 | -10.6 | -10.5 |
|                                                                                | 8.0   | 8.43  | 8.55  | 8.56  | -10.4 | -10.5 | -10.6 |
|                                                                                | 8.5   | 9.24  | 9.23  | 8.40  | -11.7 | -11.7 | -9.8  |
|                                                                                | 9.5   | 9.16  | 9.96  | 9.92  | -10.1 | -12.1 | -11.4 |

Table S2: Different ligands (c-di-GMP, endo-S-c-di-GMP, compound **5** and compound **6**) docking into CdA RNA (PDB: 3Q3Z). The different conformers of each ligand were optimized using Gaussian with fixed C5'-C5' distance of two guanines. Dockings were done in triplicate for each c-di-GMP and analog conformers.

| Ligand           | Distance (Å) between C5 of two guanines in Gaussian optimized structure | Distance (Å) between C5 of two guanines after docking |      |       | Docked binding affinity (kcal/mol) |       |       |
|------------------|-------------------------------------------------------------------------|-------------------------------------------------------|------|-------|------------------------------------|-------|-------|
| <b>c-di-GMP</b>  | 5.5                                                                     | 5.97                                                  | 5.97 | 5.97  | -10.1                              | -10.1 | -10.1 |
|                  | 6.5                                                                     | 6.5                                                   | 6.5  | 6.5   | -10.1                              | -10.1 | -10.8 |
|                  | 6.6                                                                     | 6.6                                                   | 6.6  | 6.6   | -12.5                              | -12.5 | -12.5 |
|                  | 6.7                                                                     | 6.7                                                   | 6.7  | 6.7   | -13.1                              | -13.1 | -13   |
|                  | 6.8                                                                     | 6.7                                                   | 6.8  | 6.7   | -12.9                              | -12.9 | -12.9 |
|                  | 6.9                                                                     | 6.8                                                   | 6.8  | 6.8   | -14                                | -14   | -14   |
|                  | 7.0                                                                     | 6.9                                                   | 6.9  | 6.9   | -14.3                              | -14.3 | -14.3 |
|                  | 7.1                                                                     | 7.0                                                   | 7.0  | 7.0   | -14.6                              | -14.6 | -14.6 |
|                  | 7.2                                                                     | 7.0                                                   | 7.0  | 7.0   | -14.7                              | -14.7 | -14.7 |
|                  | 7.3                                                                     | 7.1                                                   | 7.1  | 7.1   | -14.8                              | -14.8 | -14.8 |
|                  | 7.4                                                                     | 7.2                                                   | 7.2  | 7.2   | -14.7                              | -14.7 | -14.7 |
|                  | 7.5                                                                     | 7.2                                                   | 7.2  | 7.2   | -15.1                              | -15.1 | -15.1 |
|                  | 7.6                                                                     | 7.3                                                   | 7.3  | 7.3   | -14.4                              | -14.4 | -14.4 |
|                  | 7.7                                                                     | 7.4                                                   | 7.4  | 7.4   | -14.2                              | -14.2 | -14.2 |
|                  | 7.8                                                                     | 7.4                                                   | 7.4  | 7.4   | -13.9                              | -13.9 | -13.9 |
|                  | 7.9                                                                     | 7.5                                                   | 7.5  | 7.5   | -13.5                              | -13.5 | -13.5 |
|                  | 8.0                                                                     | 7.6                                                   | 7.6  | 7.6   | -13.1                              | -13.1 | -13.1 |
| 8.5              | 7.6                                                                     | 7.6                                                   | 7.6  | -13.4 | -13.4                              | -13.4 |       |
| 9.5              | 8.1                                                                     | 8.1                                                   | 8.1  | -13.1 | -13.1                              | -13.2 |       |
| <b>endoscGMP</b> | 5.5                                                                     | 5.5                                                   | 5.5  | 5.5   | -9.5                               | -9.5  | -9.5  |
|                  | 6                                                                       | 5.8                                                   | 5.8  | 5.8   | -9.7                               | -9.6  | -9.7  |
|                  | 6.5                                                                     | 6.4                                                   | 6.4  | 6.4   | -9.8                               | -9.8  | -9.8  |
|                  | 6.6                                                                     | 6.4                                                   | 6.5  | 6.4   | -9.8                               | -9.8  | -9.8  |
|                  | 6.7                                                                     | 7.4                                                   | 7.4  | 7.4   | -9.8                               | -9.8  | -9.8  |
|                  | 6.8                                                                     | 6.7                                                   | 6.7  | 6.7   | -10.7                              | -10.7 | -10.6 |
|                  | 6.9                                                                     | 7.5                                                   | 7.5  | 7.5   | -9.9                               | -9.8  | -9.9  |
|                  | 7                                                                       | 7.5                                                   | 7.5  | 7.5   | -9.9                               | -9.9  | -9.9  |
|                  | 7.1                                                                     | 7.6                                                   | 7.6  | 7.6   | -9.9                               | -9.9  | -9.9  |
|                  | 7.2                                                                     | 7.7                                                   | 7.7  | 7.7   | -9.9                               | -9.9  | -9.9  |
|                  | 7.3                                                                     | 7.1                                                   | 7.1  | 7.1   | -10                                | -10   | -10   |
|                  | 7.4                                                                     | 7.2                                                   | 7.2  | 7.2   | -10.1                              | -10   | -10.1 |
|                  | 7.5                                                                     | 7.7                                                   | 7.7  | 7.7   | -10.9                              | -10.9 | -10.9 |
|                  | 7.6                                                                     | 8.1                                                   | 8.1  | 8.1   | -10.1                              | -10.1 | -10.1 |
| 7.7              | 8.2                                                                     | 8.2                                                   | 8.2  | -10.1 | -10.1                              | -10.1 |       |
| 7.8              | 8.2                                                                     | 8.2                                                   | 8.3  | -10.1 | -10.1                              | -10.1 |       |
| 7.9              | 7.3                                                                     | 7.3                                                   | 7.3  | -11.1 | -11.1                              | -11.1 |       |

|                                                                                |      |      |      |       |       |       |       |
|--------------------------------------------------------------------------------|------|------|------|-------|-------|-------|-------|
|                                                                                | 8    | 7.4  | 7.4  | 7.4   | -11.1 | -11.1 | -11   |
|                                                                                | 8.5  | 7.9  | 7.9  | 8.0   | -11.3 | -11.3 | -11.3 |
|                                                                                | 9.5  | 9.2  | 9.2  | 9.2   | -10.7 | -10.7 | -10.7 |
| <b>Compound 5</b><br><b>(model for 2'-[Biotin]-</b><br><b>endo-S-c-di-GMP)</b> | 5.5  | 6.6  | 6.8  | 6.6   | -9.8  | -10   | -9.8  |
|                                                                                | 6.5  | 7.5  | 7.5  | 7.5   | -10   | -10   | -10   |
|                                                                                | 6.6  | 7.4  | 7.6  | 7.6   | -10.4 | -10   | -10   |
|                                                                                | 6.7  | 7.4  | 7.4  | 7.4   | -10.5 | -10.8 | -10.5 |
|                                                                                | 6.8  | 7.5  | 7.5  | 7.5   | -10.9 | -11   | -10.9 |
|                                                                                | 6.9  | 7.6  | 7.6  | 7.6   | -10.8 | -10.9 | -10.9 |
|                                                                                | 7    | 7.7  | 7.7  | 7.7   | -11.1 | -11   | -10.9 |
|                                                                                | 7.1  | 7.7  | 7.7  | 7.7   | -11   | -11   | -10.9 |
|                                                                                | 7.2  | 8.1  | 8.1  | 8.1   | -10.3 | -10.3 | -10.3 |
|                                                                                | 7.3  | 8.2  | 8.2  | 8.2   | -10.2 | -10.2 | -10.2 |
|                                                                                | 7.4  | 8.3  | 8.3  | 8.3   | -10.3 | -10.3 | -10.3 |
|                                                                                | 7.5  | 8.8  | 8.8  | 8.8   | -11.4 | -11.4 | -11.4 |
|                                                                                | 7.6  | 9.0  | 9.0  | 9.0   | -10.5 | -10.5 | -10.5 |
|                                                                                | 7.7  | 9.1  | 9.1  | 9.1   | -10.4 | -10.4 | -10.4 |
|                                                                                | 7.8  | 9.2  | 9.2  | 9.2   | -10.3 | -10.3 | -10.3 |
| 8                                                                              | 9.4  | 9.4  | 9.4  | -10   | -10   | -10   |       |
| 8.5                                                                            | 9.4  | 9.4  | 9.4  | -11.1 | -11.1 | -11.1 |       |
| 9.5                                                                            | 10.4 | 10.4 | 10.4 | -11   | -11   | -11   |       |
| <b>Compound 6</b><br><b>(model for 2'-[Biotin]</b><br><b>-AHC-c-di-GMP)</b>    | 5.5  | 6.4  | 6.4  | 6.5   | -8.8  | -8.8  | -8.9  |
|                                                                                | 6.5  | 7.4  | 7.4  | 7.4   | -10   | -10   | -10   |
|                                                                                | 6.8  | 7.0  | 7.0  | 7.0   | -8.6  | -8.7  | -8.6  |
|                                                                                | 6.9  | 8.0  | 8.0  | 8.0   | -9.1  | -9.1  | -9.1  |
|                                                                                | 7    | 8.1  | 8.1  | 8.1   | -9.2  | -9.2  | -9.2  |
|                                                                                | 7.1  | 8.2  | 8.2  | 8.2   | -9.3  | -9.3  | -9.3  |
|                                                                                | 7.2  | 8.3  | 8.3  | 8.3   | -9.4  | -9.4  | -9.4  |
|                                                                                | 7.5  | 8.3  | 8.3  | 8.3   | -9.2  | -9.2  | -9.2  |
|                                                                                | 8    | 8.9  | 8.9  | 8.9   | -9.4  | -9.4  | -9.4  |
|                                                                                | 8.5  | 9.4  | 9.4  | 9.4   | -10.5 | -10.5 | -10.5 |
|                                                                                | 9.5  | 10.4 | 10.4 | 10.4  | -10.5 | -10.6 | -10.6 |

Table S3: Different ligands (c-di-GMP, endo-S-c-di-GMP, compound **5** and compound **6**) docking into WspR protein (PDB: 3I5A). The different conformers of each ligand were optimized using Gaussian with fixed C5'-C5' distance of two guanines. Dockings were done in triplicate for each c-di-GMP and analog conformers.

| Ligand                 | Distance (Å) between C5 of two guanines in Gaussian optimized structure | Distance (Å) between C5 of two guanines after docking |     |       | Docked binding affinity (kcal/mol) |       |       |
|------------------------|-------------------------------------------------------------------------|-------------------------------------------------------|-----|-------|------------------------------------|-------|-------|
|                        |                                                                         |                                                       |     |       |                                    |       |       |
| <b>c-di-GMP</b>        | 5.5                                                                     | 6.1                                                   | 6.1 | 6.1   | -8.6                               | -8.6  | -8.6  |
|                        | 6.5                                                                     | 6.5                                                   | 6.5 | 6.5   | -10.2                              | -10.1 | -10.2 |
|                        | 6.6                                                                     | 6.6                                                   | 6.6 | 6.6   | -11.3                              | -11.3 | -11.3 |
|                        | 6.7                                                                     | 6.7                                                   | 6.7 | 6.7   | -11.4                              | -11.4 | -11.4 |
|                        | 6.8                                                                     | 6.7                                                   | 6.7 | 6.7   | -10.7                              | -10.7 | -10.7 |
|                        | 6.9                                                                     | 6.8                                                   | 6.8 | 6.8   | -11.6                              | -11.6 | -11.6 |
|                        | 7                                                                       | 6.9                                                   | 6.9 | 6.9   | -11.7                              | -11.7 | -11.7 |
|                        | 7.1                                                                     | 6.9                                                   | 6.9 | 6.9   | -11.7                              | -11.7 | -11.7 |
|                        | 7.2                                                                     | 7.0                                                   | 7.0 | 7.0   | -11.7                              | -11.7 | -11.7 |
|                        | 7.3                                                                     | 7.0                                                   | 7.0 | 7.0   | -11.7                              | -11.7 | -11.7 |
|                        | 7.4                                                                     | 7.1                                                   | 7.1 | 7.1   | -11.6                              | -11.6 | -11.6 |
|                        | 7.5                                                                     | 7.2                                                   | 7.2 | 7.2   | -11.2                              | -11.3 | -11.3 |
|                        | 7.6                                                                     | 7.2                                                   | 7.2 | 7.2   | -11.5                              | -11.4 | -11.5 |
|                        | 7.7                                                                     | 7.3                                                   | 7.3 | 7.3   | -11.3                              | -11.3 | -11.3 |
|                        | 7.8                                                                     | 7.3                                                   | 7.3 | 7.2   | -11                                | -11   | -11   |
|                        | 7.9                                                                     | 7.2                                                   | 7.2 | 7.2   | -11                                | -11   | -11   |
|                        | 8                                                                       | 7.3                                                   | 7.3 | 7.3   | -11                                | -11   | -11   |
| 8.5                    | 7.4                                                                     | 7.4                                                   | 7.4 | -11.8 | -11.8                              | -11.8 |       |
| 9.5                    | 8.2                                                                     | 8.2                                                   | 8.2 | -12.4 | -12.4                              | -12.4 |       |
| 10.5                   | 9.1                                                                     | 9.1                                                   | 9.1 | -12.5 | -12.5                              | -12.5 |       |
| <b>endo-S-c-di-GMP</b> | 6                                                                       | 6.4                                                   | 6.5 | 5.2   | -8.1                               | -8.1  | -8    |
|                        | 6.5                                                                     | 6.6                                                   | 6.6 | 6.6   | -8.5                               | -8.5  | -8.5  |
|                        | 6.6                                                                     | 6.7                                                   | 6.7 | 6.7   | -8.6                               | -8.6  | -8.6  |
|                        | 6.7                                                                     | 7.6                                                   | 7.6 | 7.6   | -9                                 | -9    | -9    |
|                        | 6.8                                                                     | 7.5                                                   | 7.5 | 7.5   | -8.8                               | -8.8  | -8.8  |
|                        | 6.9                                                                     | 7.0                                                   | 7.1 | 7.0   | -9.1                               | -9.2  | -9.2  |
|                        | 7                                                                       | 7.8                                                   | 7.8 | 7.8   | -10                                | -10   | -10   |
|                        | 7.1                                                                     | 7.5                                                   | 7.5 | 7.5   | -10.3                              | -10.3 | -10.3 |
|                        | 7.2                                                                     | 7.6                                                   | 7.6 | 7.6   | -10.2                              | -10.2 | -10.2 |
|                        | 7.3                                                                     | 7.8                                                   | 7.7 | 8.0   | -10.3                              | -10.3 | -10.3 |
|                        | 7.4                                                                     | 7.8                                                   | 7.8 | 7.8   | -10.3                              | -10.2 | -10.2 |
|                        | 7.5                                                                     | 7.4                                                   | 7.4 | 7.4   | -9.3                               | -9.3  | -9.3  |
|                        | 7.6                                                                     | 7.7                                                   | 7.7 | 7.7   | -9.1                               | -9.1  | -9.1  |
|                        | 7.7                                                                     | 7.8                                                   | 7.8 | 7.8   | -9.1                               | -9.1  | -9.1  |
| 7.8                    | 7.8                                                                     | 7.8                                                   | 7.8 | -9.2  | -9.2                               | -9.2  |       |

|                                                                     |     |      |      |      |       |       |       |
|---------------------------------------------------------------------|-----|------|------|------|-------|-------|-------|
|                                                                     | 7.9 | 7.3  | 7.3  | 7.3  | -10.3 | -10.3 | -10.2 |
|                                                                     | 8   | 7.3  | 7.3  | 7.3  | -10.2 | -10.2 | -10.2 |
|                                                                     | 8.5 | 7.7  | 7.7  | 7.7  | -10   | -10   | -10   |
|                                                                     | 9.5 | 8.6  | 8.6  | 8.6  | -9.9  | -9.9  | -9.9  |
| <b>Compound 5</b><br>(model for<br>2'-[Biotin]-<br>endo-S-c-di-GMP) | 6.5 | 7.3  | 7.3  | 7.3  | -9.4  | -9.4  | -9.4  |
|                                                                     | 6.6 | 7.3  | 7.4  | 7.3  | -9.3  | -9.4  | -9.3  |
|                                                                     | 6.7 | 7.4  | 7.4  | 7.4  | -9.4  | -9.4  | -9.4  |
|                                                                     | 6.8 | 7.5  | 7.5  | 7.5  | -9.4  | -9.4  | -9.4  |
|                                                                     | 6.9 | 7.6  | 7.6  | 7.6  | -9.3  | -9.4  | -9.4  |
|                                                                     | 7   | 7.7  | 7.7  | 7.7  | -9.2  | -9.2  | -9.2  |
|                                                                     | 7.1 | 7.7  | 7.7  | 7.7  | -9.3  | -9.3  | -9.2  |
|                                                                     | 7.2 | 7.9  | 8.2  | 8.2  | -8.9  | -8.8  | -8.8  |
|                                                                     | 7.3 | 7.2  | 7.2  | 7.2  | -10   | -10   | -10   |
|                                                                     | 7.4 | 7.3  | 7.3  | 7.3  | -9.9  | -9.9  | -9.9  |
|                                                                     | 7.5 | 8.9  | 8.9  | 8.9  | -8.4  | -8.4  | -8.4  |
|                                                                     | 7.6 | 9.0  | 9.0  | 9.0  | -9.1  | -9.1  | -9.1  |
|                                                                     | 7.7 | 9.1  | 9.1  | 9.1  | -9    | -9.1  | -9.1  |
|                                                                     | 7.8 | 9.2  | 9.2  | 9.2  | -9    | -9    | -9    |
| 8                                                                   | 8.3 | 9.4  | 8.3  | -9.1 | -8.9  | -9    |       |
| 8.5                                                                 | 9.9 | 9.6  | 9.5  | -7.8 | -7.9  | -7.8  |       |
| 9.5                                                                 | 9.7 | 9.7  | 9.7  | -7.6 | -7.6  | -7.6  |       |
| <b>Compound 6</b><br>(model for 2'-[Biotin]<br>-AHC-c-di-GMP)       | 5.5 | 6.2  | 6.5  | 6.5  | -7.4  | -7.4  | -7.4  |
|                                                                     | 6.5 | 6.6  | 6.6  | 6.6  | -8.5  | -8.6  | -8.7  |
|                                                                     | 6.8 | 6.8  | 6.8  | 6.8  | -8.6  | -8.6  | -8.6  |
|                                                                     | 6.9 | 7.4  | 7.4  | 7.4  | -8.6  | -8.6  | -8.6  |
|                                                                     | 7   | 7.4  | 7.4  | 7.5  | -7.9  | -8.7  | -8.5  |
|                                                                     | 7.1 | 7.5  | 7.5  | 7.5  | -7.8  | -7.9  | -7.9  |
|                                                                     | 7.2 | 7.9  | 7.9  | 7.6  | -8    | -8    | -7.9  |
|                                                                     | 7.5 | 7.4  | 7.4  | 7.4  | -8.3  | -8.4  | -8.4  |
|                                                                     | 8   | 8.8  | 8.8  | 8.8  | -8.4  | -8.4  | -8.5  |
|                                                                     | 8.5 | 9.3  | 9.3  | 9.5  | -8.3  | -8.4  | -8.3  |
|                                                                     | 9.5 | 10.4 | 10.4 | 10.4 | -8.4  | -8.4  | -8.4  |

Figure S1: Plots of binding energies versus distance between the two guanine nucleobases (after docking) of *c*-di-GMP, endo-*S*-*c*-di-GMP, compound **5** or compound **6** when docked into CdA RNA (PDB: 3Q3Z). Dockings were done in triplicate for each *c*-di-GMP or analog conformer.

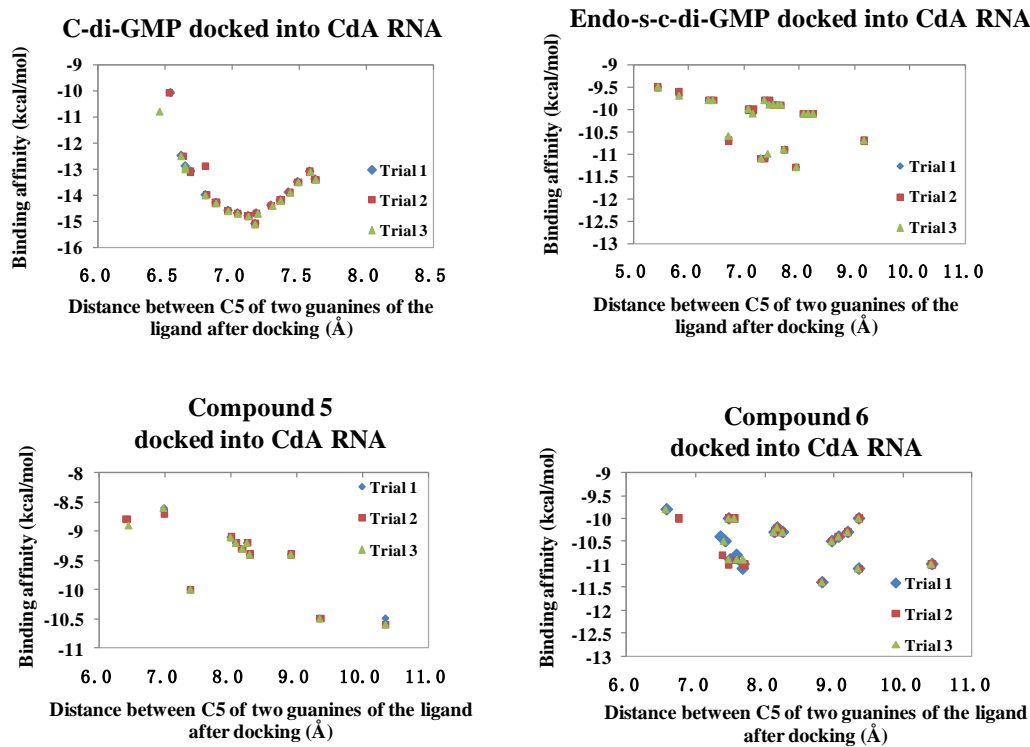

Figure S2: Plots of binding energies versus distance between the two guanine nucleobases (after docking) of c-di-GMP, endo-S-c-di-GMP, compound **5** or compound **6** when docked into WsprR protein (PDB: 3I5A). Dockings were done in triplicate for each c-di-GMP or analog conformer.

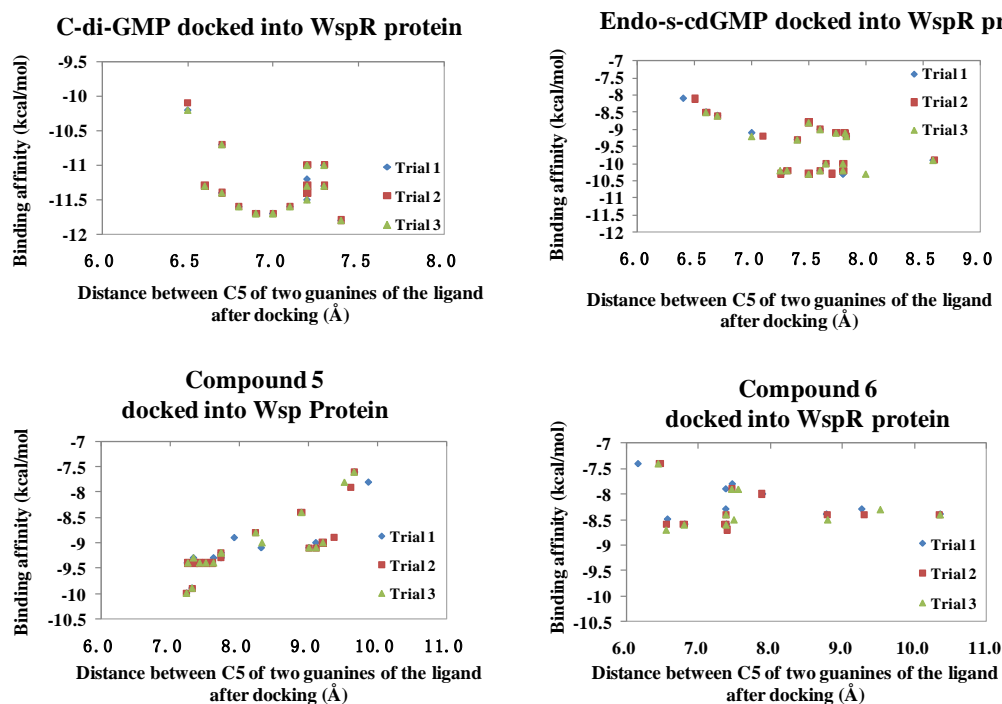

Supplement: c2mb05338a.pdf [file c2mb05338a.pdf]
